# Supplementary material for: Influence of Serotonin 5-HT4 Receptors on Responses to Cardiac Stressors in Transgenic Mouse Models
Source: MDPI journal article supplement (doi:10.3390/biomedicines9050569), 2021-05-18
Supplement: s1 [file s1]

# **Influence of serotonin 5-HT<sub>4</sub> receptors on responses to cardiac stressors in transgenic mouse models**

Ulrich Gergs<sup>1</sup>, Timo Gerigk<sup>1</sup>, Jonas Wittschier<sup>1</sup>, Constanze T. Schmidbaur<sup>1</sup>, Clara Röttger<sup>1</sup>, Mareen Mahnkopf<sup>1</sup>, Hanna Edler<sup>1</sup>, Hartmut Wache<sup>1</sup>, Joachim Neumann<sup>1\*</sup>

<sup>1</sup>Institute for Pharmacology and Toxicology, Medical Faculty, Martin Luther University Halle-Wittenberg, Halle (Saale), Germany

## **Supplementary Figures**

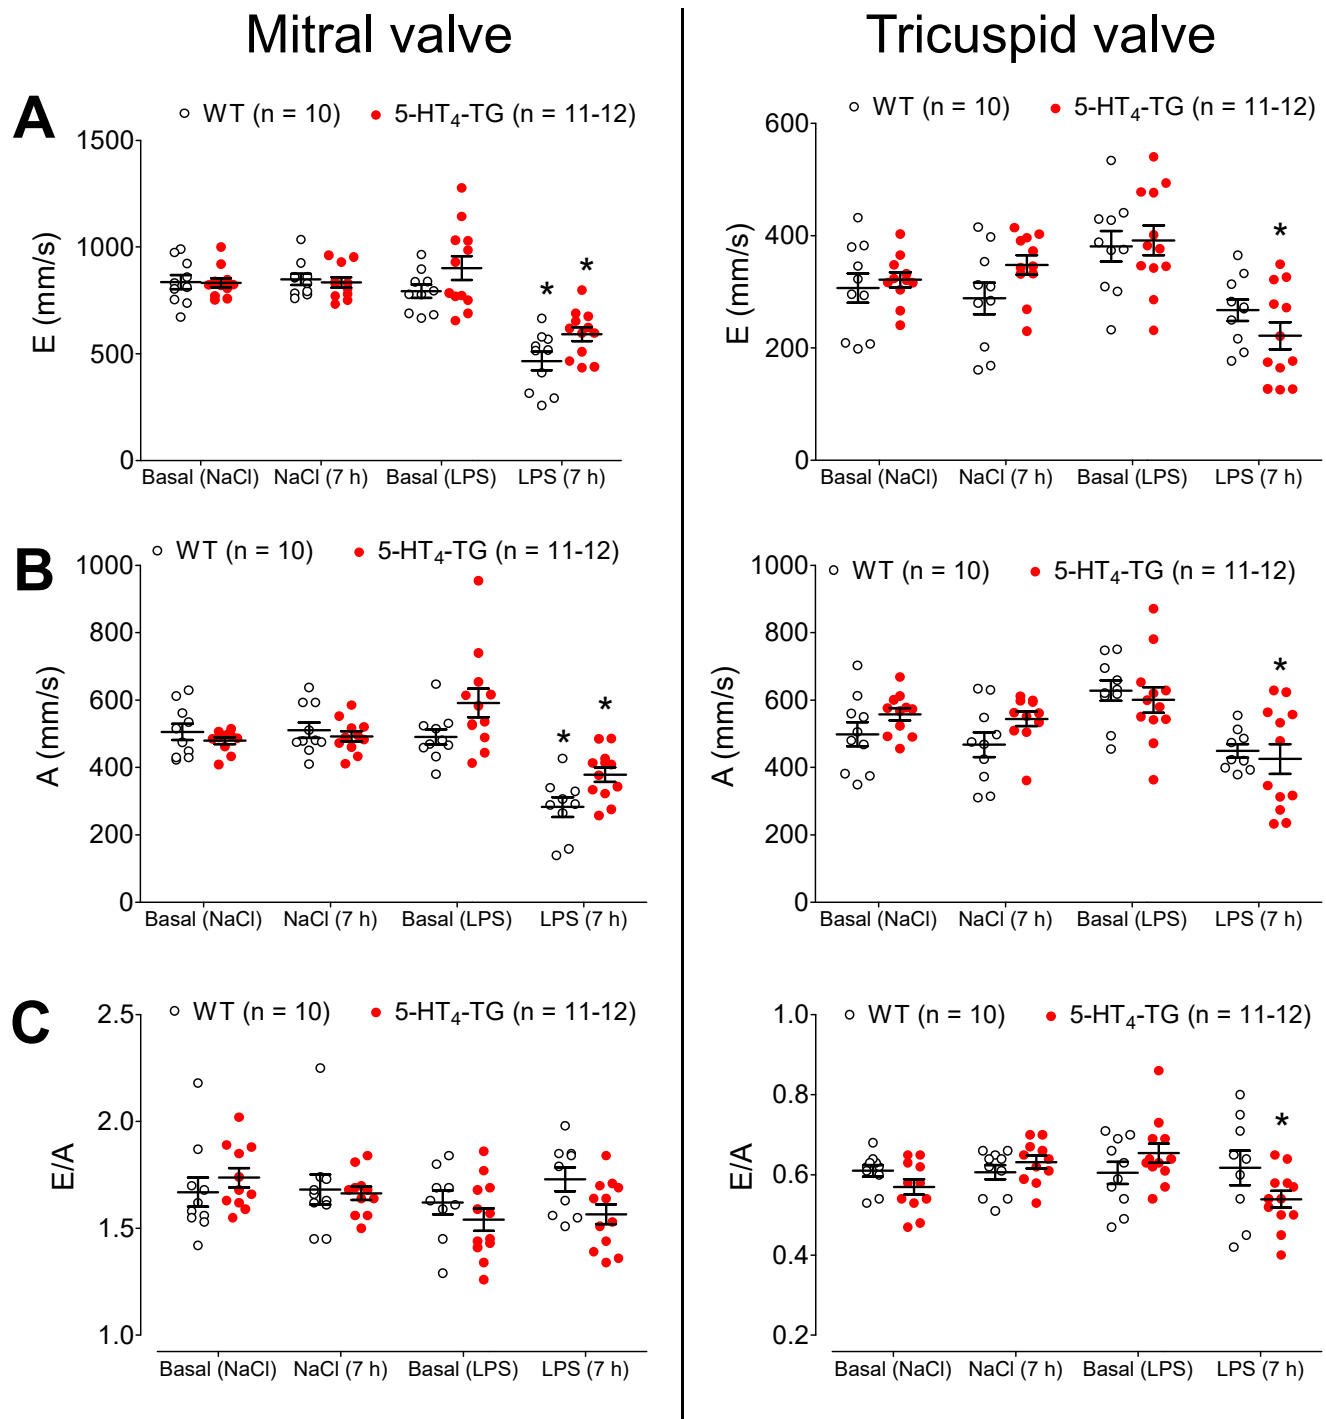

**Supplementary Figure S1.** Doppler echocardiography of 5-HT<sub>4</sub>-TG mice before and after LPS treatment. The flow over the mitral valve (left side) and over the tricuspid valve (right side) was measured before (basal) and 7 h after LPS injection. The injection of a NaCl solution served as control. **(A)** The E wave represents the early filling of the ventricle and **(B)** the A wave represents the atrial contraction. **(C)** The diastolic function expressed as ratio of E and A waves (E/A) was unchanged in all groups. Number in brackets indicates the number of mice studied. WT = wild type mice; \*p < 0.05 vs. basal.

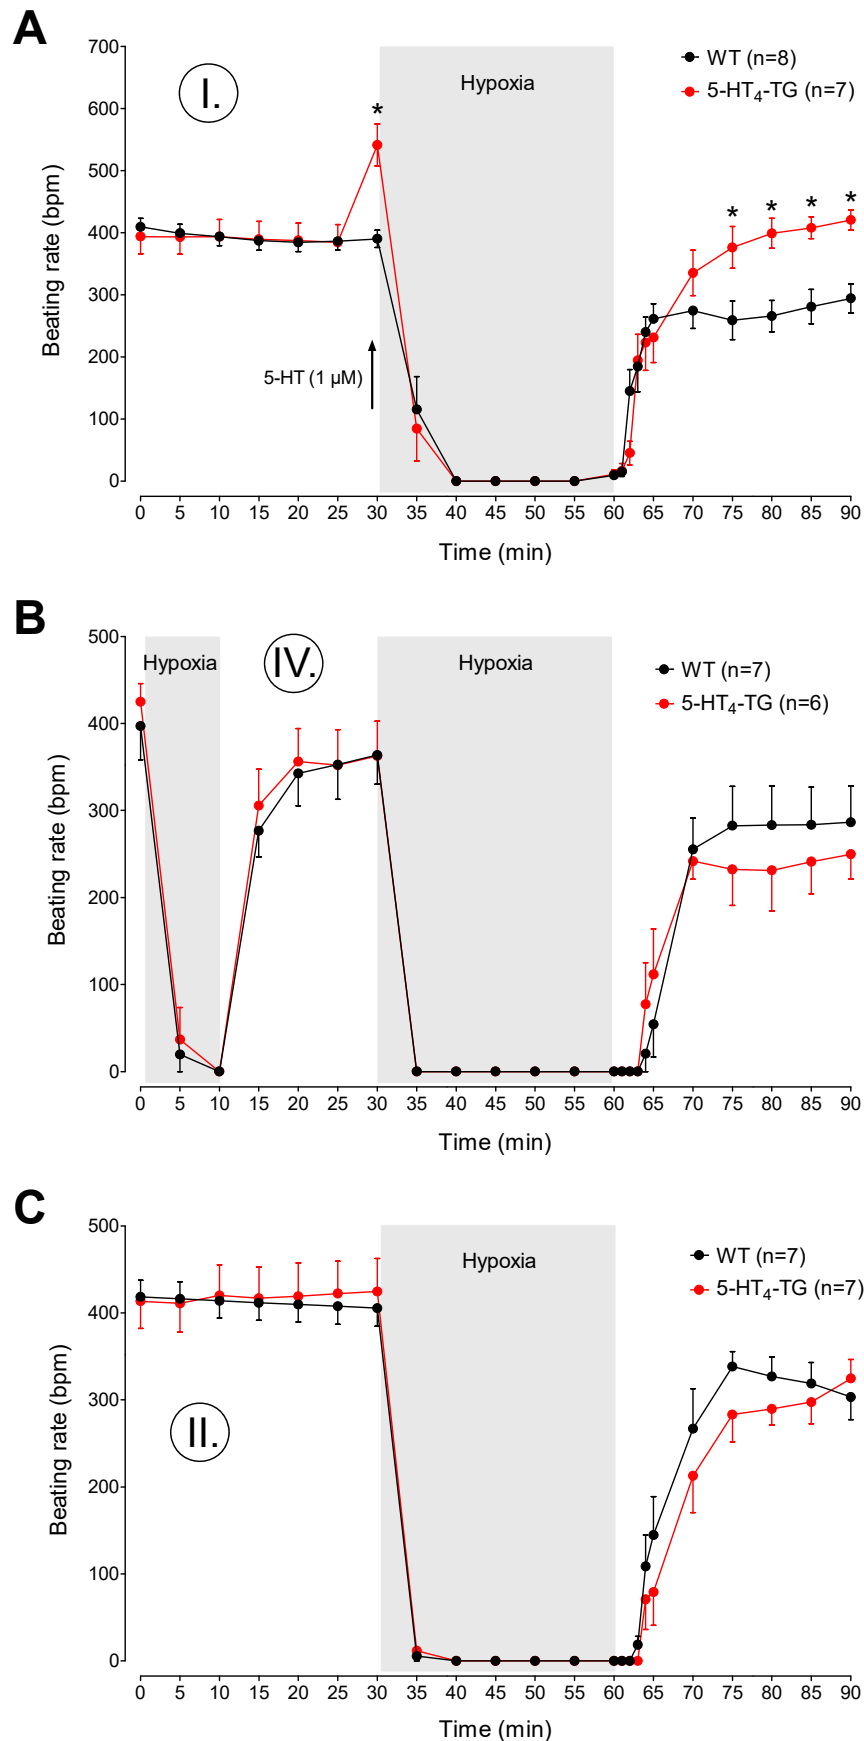

**Supplementary Figure S2.** Time course of hypoxia in spontaneously beating right atrial preparations. **(A-C)** The beating rate during the time of oxygenation and hypoxia is presented. After the addition of serotonin (5-HT, 1  $\mu$ M, protocol I) beating rate was increased in 5-HT<sub>4</sub>-TG and reached again initial values after hypoxia and reoxygenation **(A)**. Preconditioning (protocol IV) as a short hypoxia for 10 minutes was not beneficial **(B)**. Under the condition of a single hypoxia (protocol II), the beating rate was not different between 5-HT<sub>4</sub>-TG and WT right atria **(C)**. WT = wild type mice, 5-HT<sub>4</sub>-TG=5-HT<sub>4</sub>-transgenic mice. Data shown are means  $\pm$  SEM. \*p < 0.05 vs. WT.

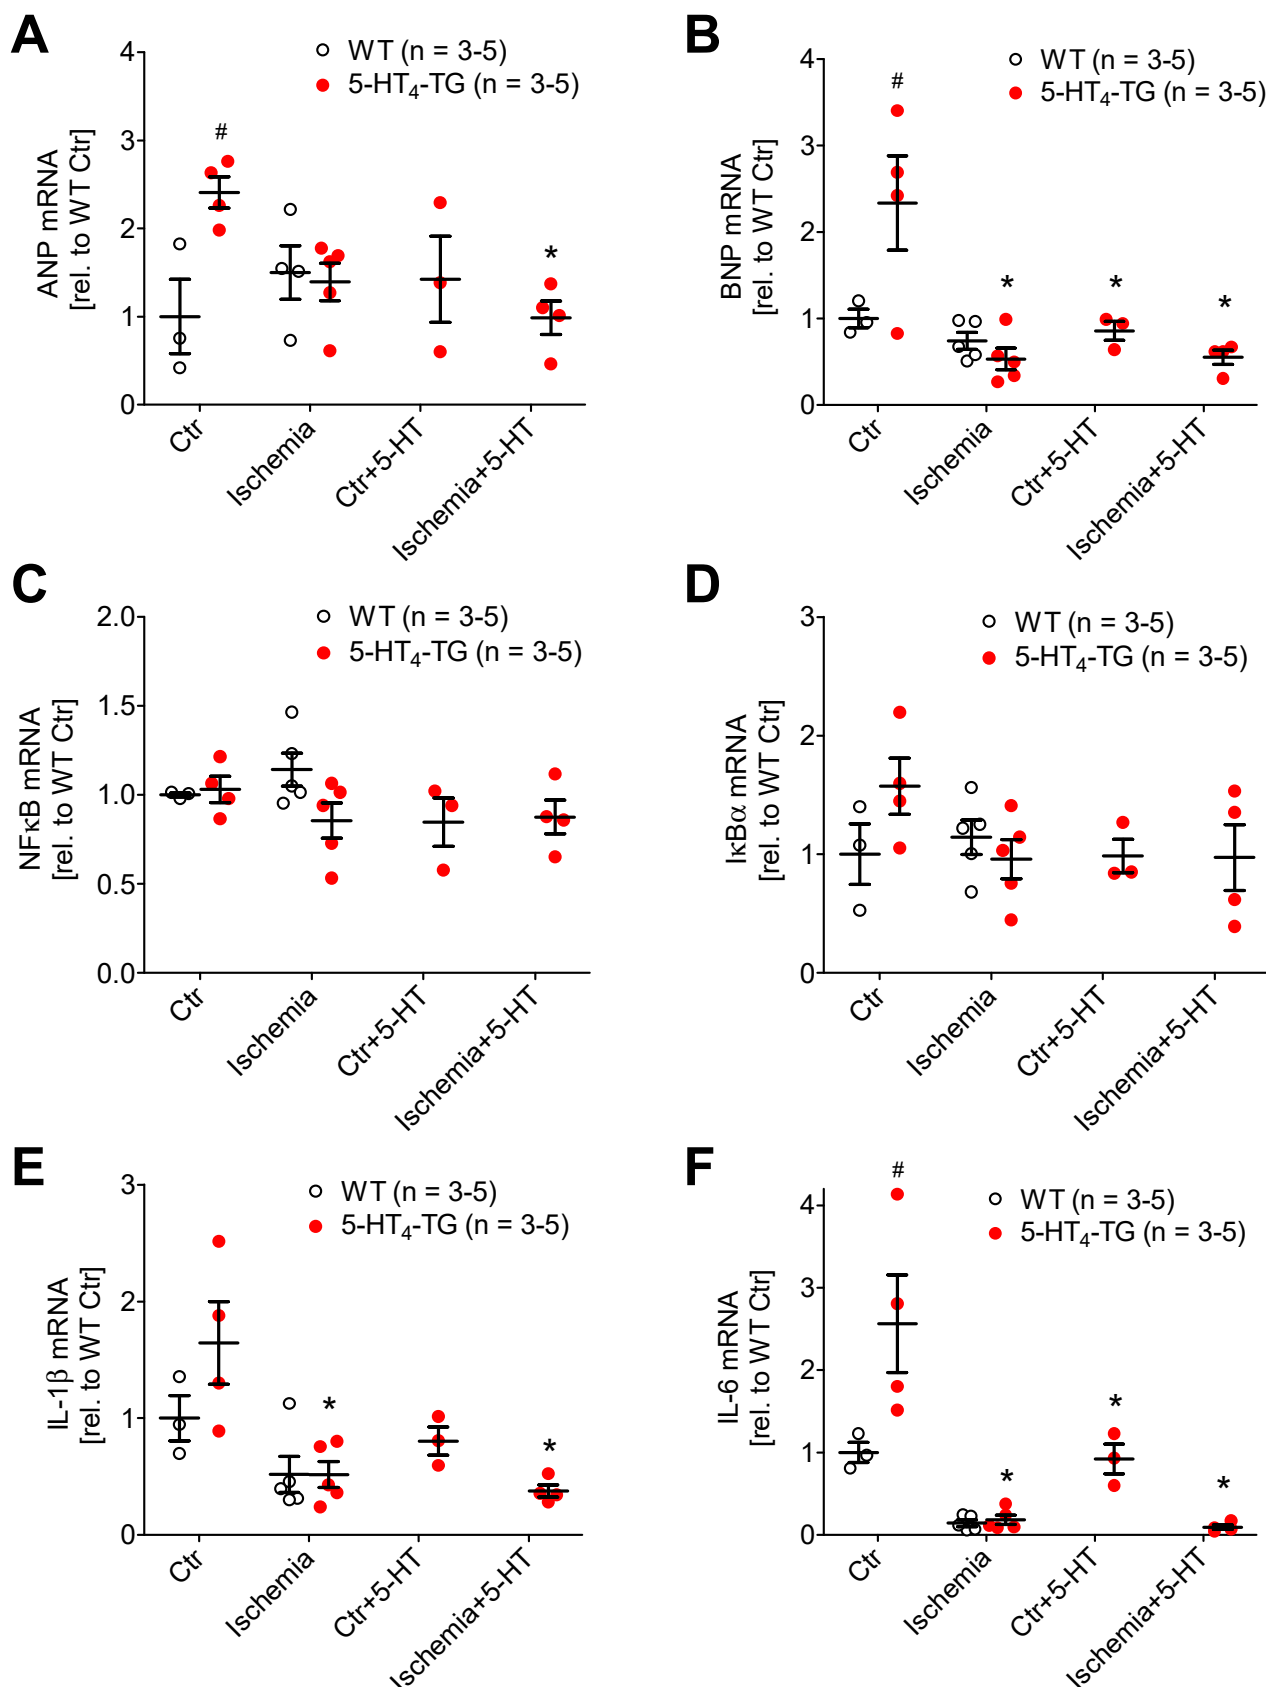

**Supplementary Figure S3.** mRNA expression after ischemia/reperfusion in isolated perfused hearts. Abundance of mRNAs, measured by quantitative real time PCR (qPCR), after ischemia/reperfusion in isolated perfused hearts of WT and 5-HT<sub>4</sub>-TG mice (see Fig. 8A for the protocol). Expression of **(A)** ANP, **(B)** BNP, **(C)** NFκB, **(D)** IκBα, **(E)** IL-1β, and **(F)** IL-6 mRNAs in hearts from WT and 5-HT<sub>4</sub>-TG mice was normalized to GAPDH expression. Finally, mRNA expression data are presented relative to WT control (Ctr) mice. WT = wild type mice, 5-HT<sub>4</sub>-TG=5-HT<sub>4</sub>-transgenic mice. Data shown are means ± SEM. \*p < 0.05 vs. Ctr.; #p < 0.05 vs. WT; numbers in brackets indicate numbers of preparations.

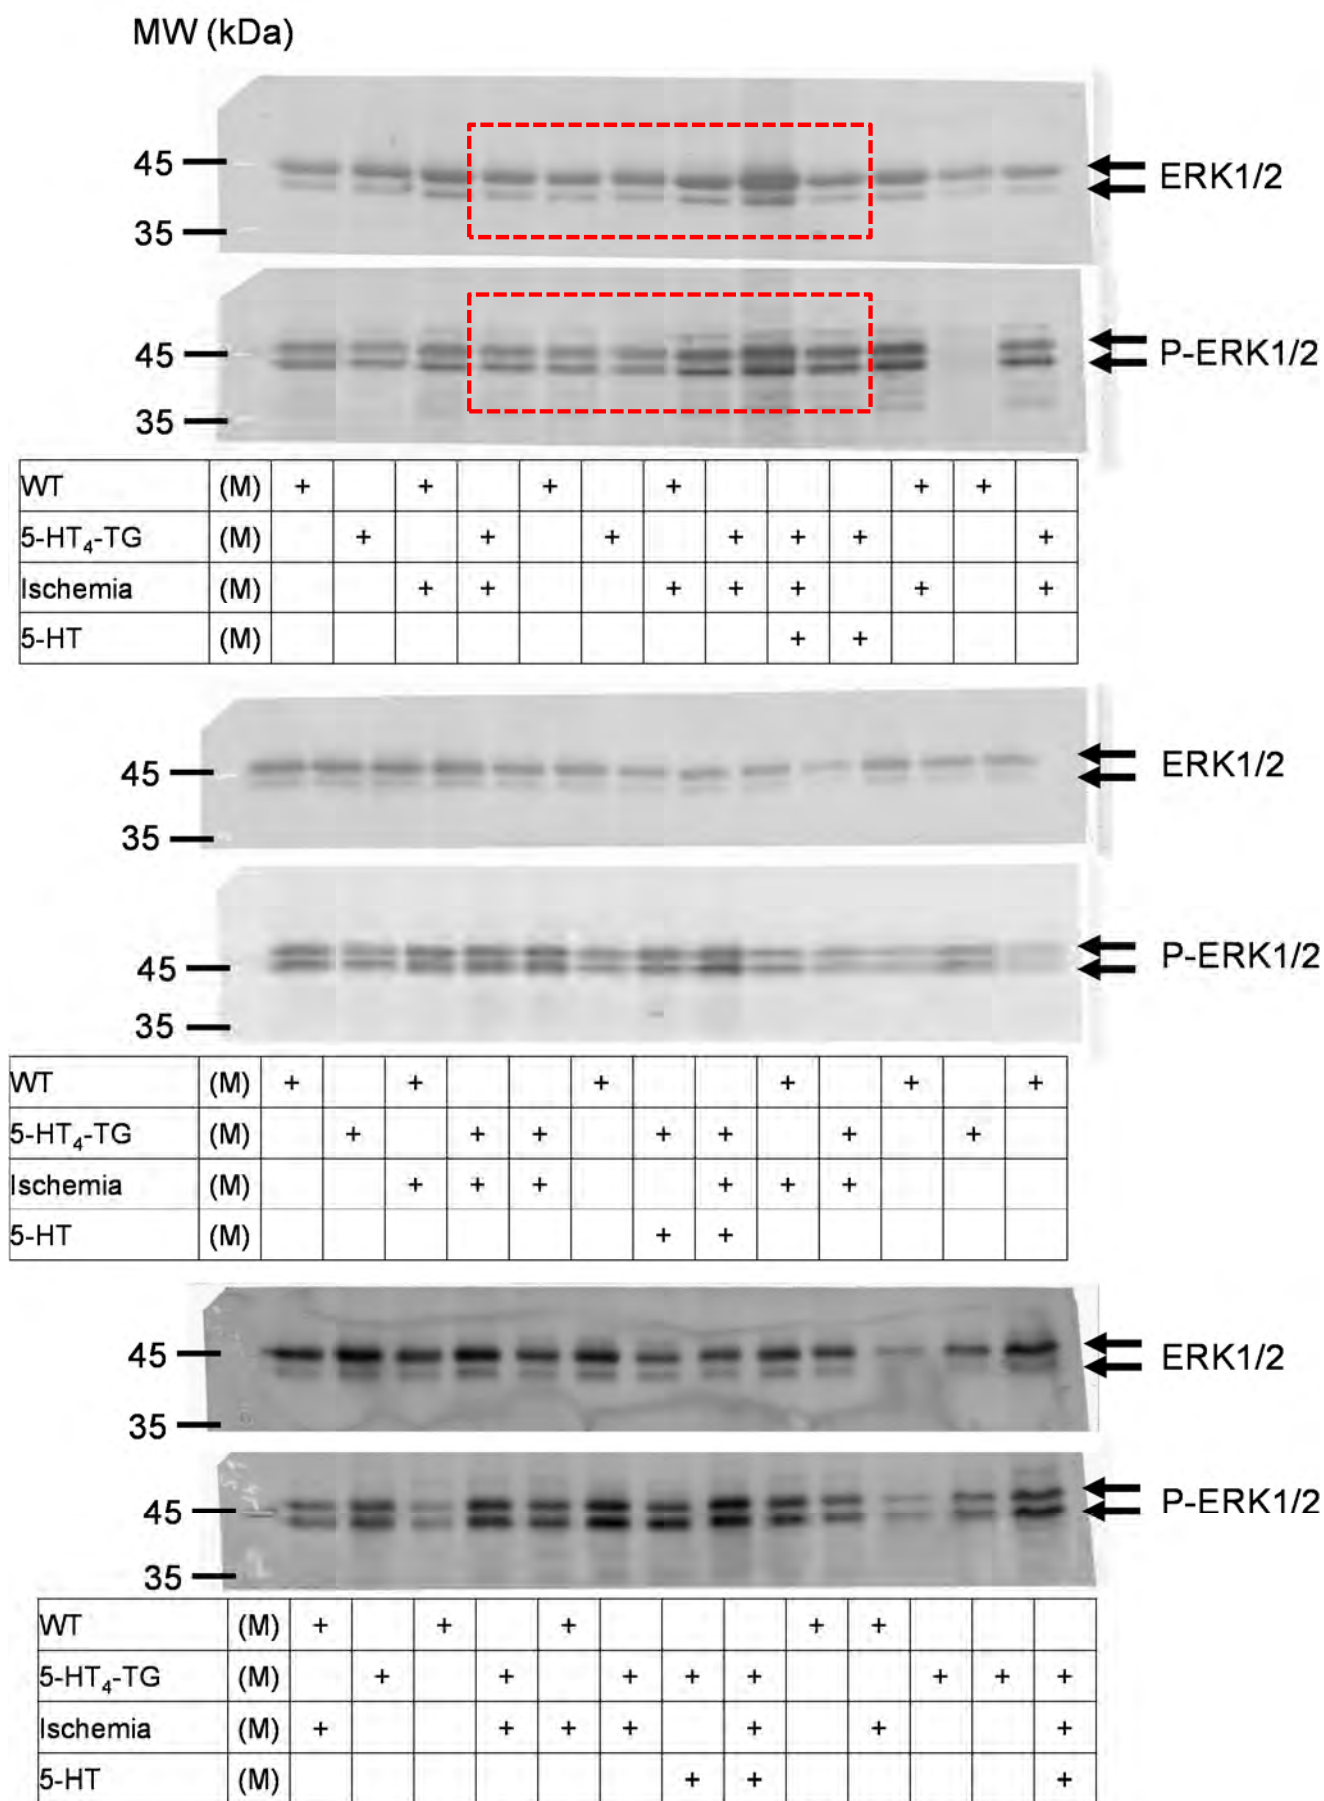

**Supplementary Figure S4 (unedited Western blots):** Original Western blots of homogenates from isolated perfused hearts with or without ischemia of wild type (WT) and 5-HT<sub>4</sub> receptor transgenic (5-HT<sub>4</sub>-TG) mice. M, molecular weight marker; 5-HT, serotonin (1  $\mu$ M); ERK1/2, extracellular regulated kinase 1/2; P-ERK1/2, phosphorylated ERK1/2. Not all bands were suitable for quantification (border lanes or duplicates). The red rectangles mark the part of the blot shown in Figure 7.

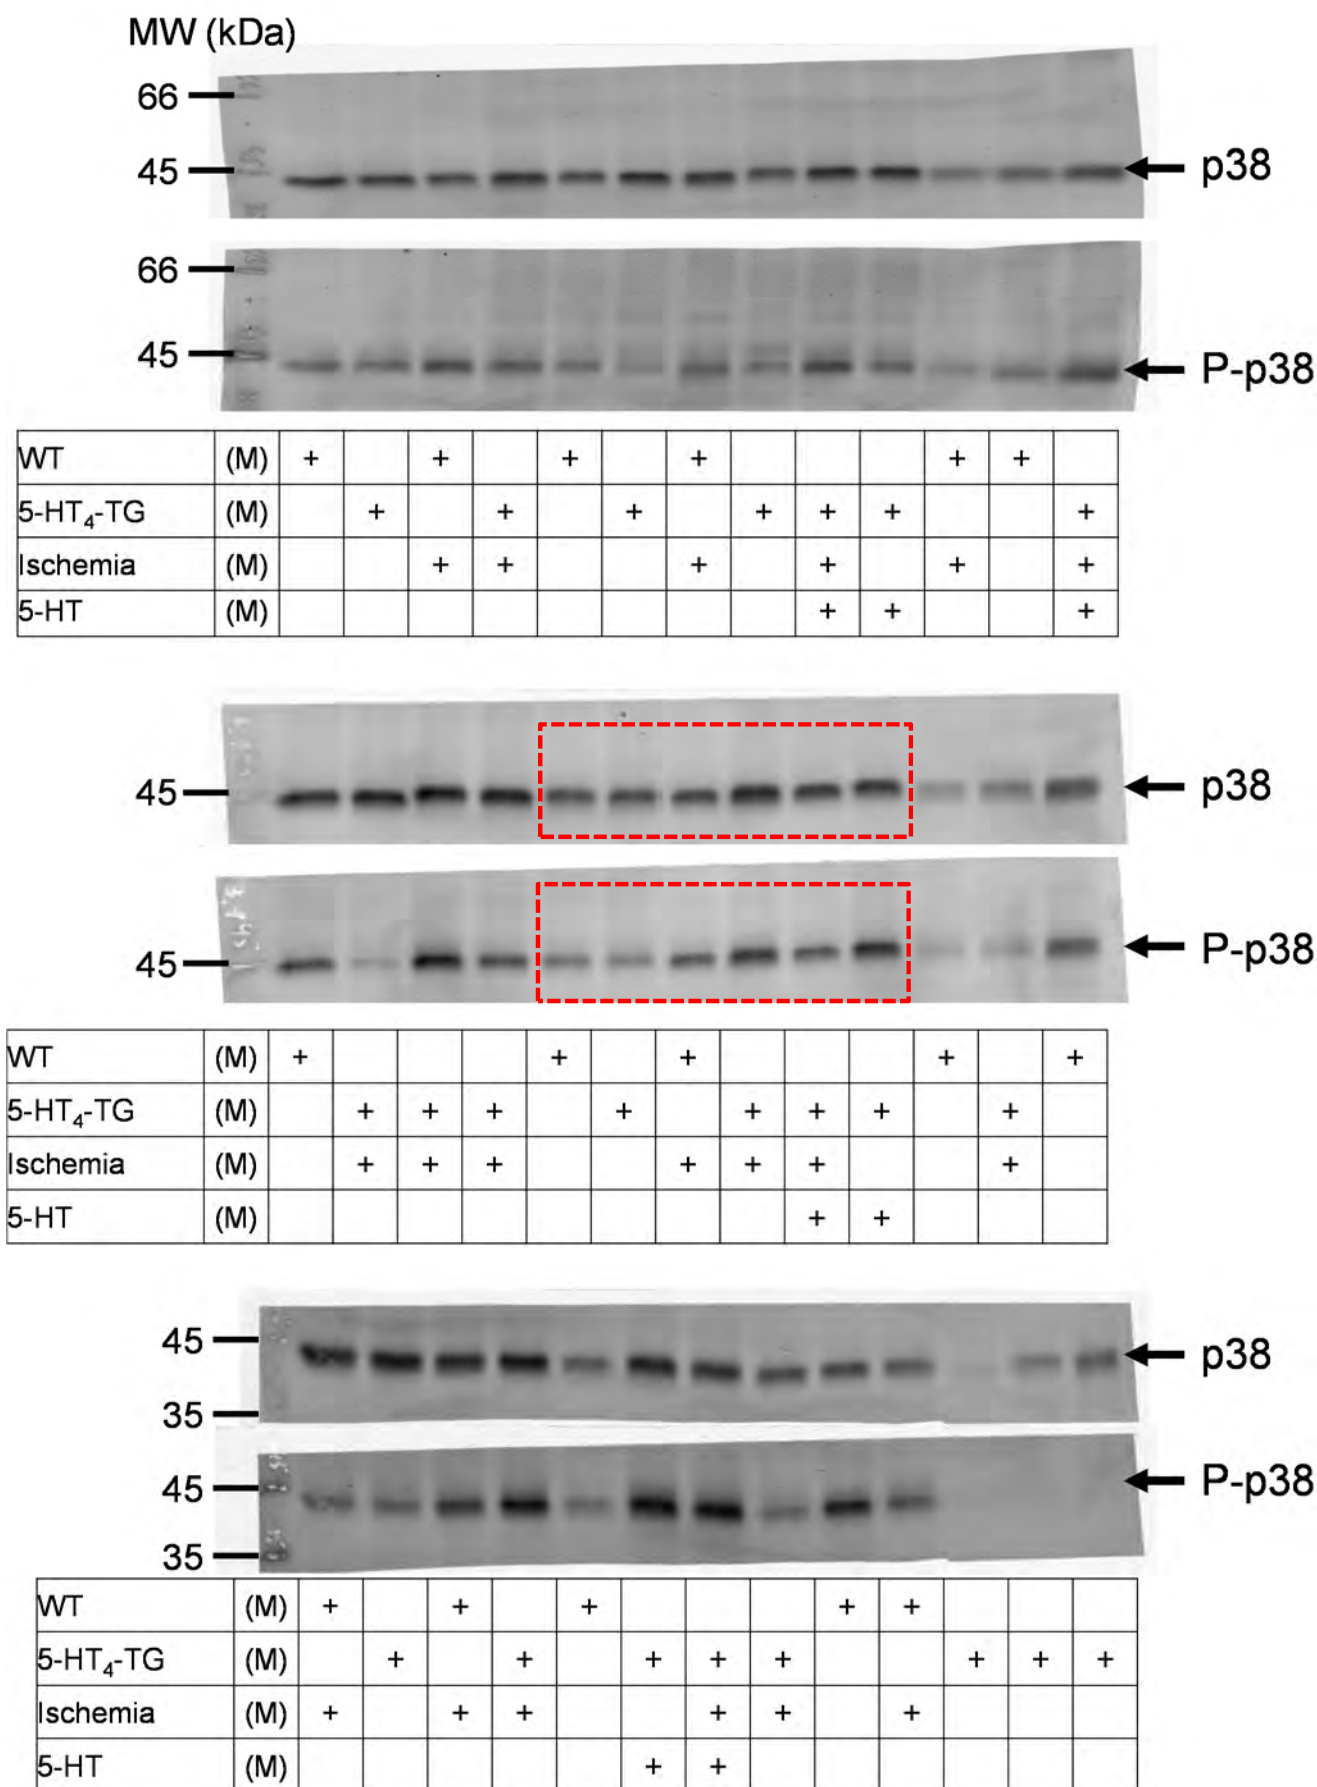

**Supplementary Figure S5 (unedited Western blots):** Original Western blots of homogenates from isolated perfused hearts with or without ischemia of wild type (WT) and 5-HT<sub>4</sub> receptor transgenic (5-HT<sub>4</sub>-TG) mice. M, molecular weight marker; 5-HT, serotonin (1  $\mu$ M); p38, mitogen activated protein kinase p38; P-p38, phosphorylated p38. Not all bands were suitable for quantification (border lanes or duplicates). The red rectangles mark the part of the blot shown in Figure 7.

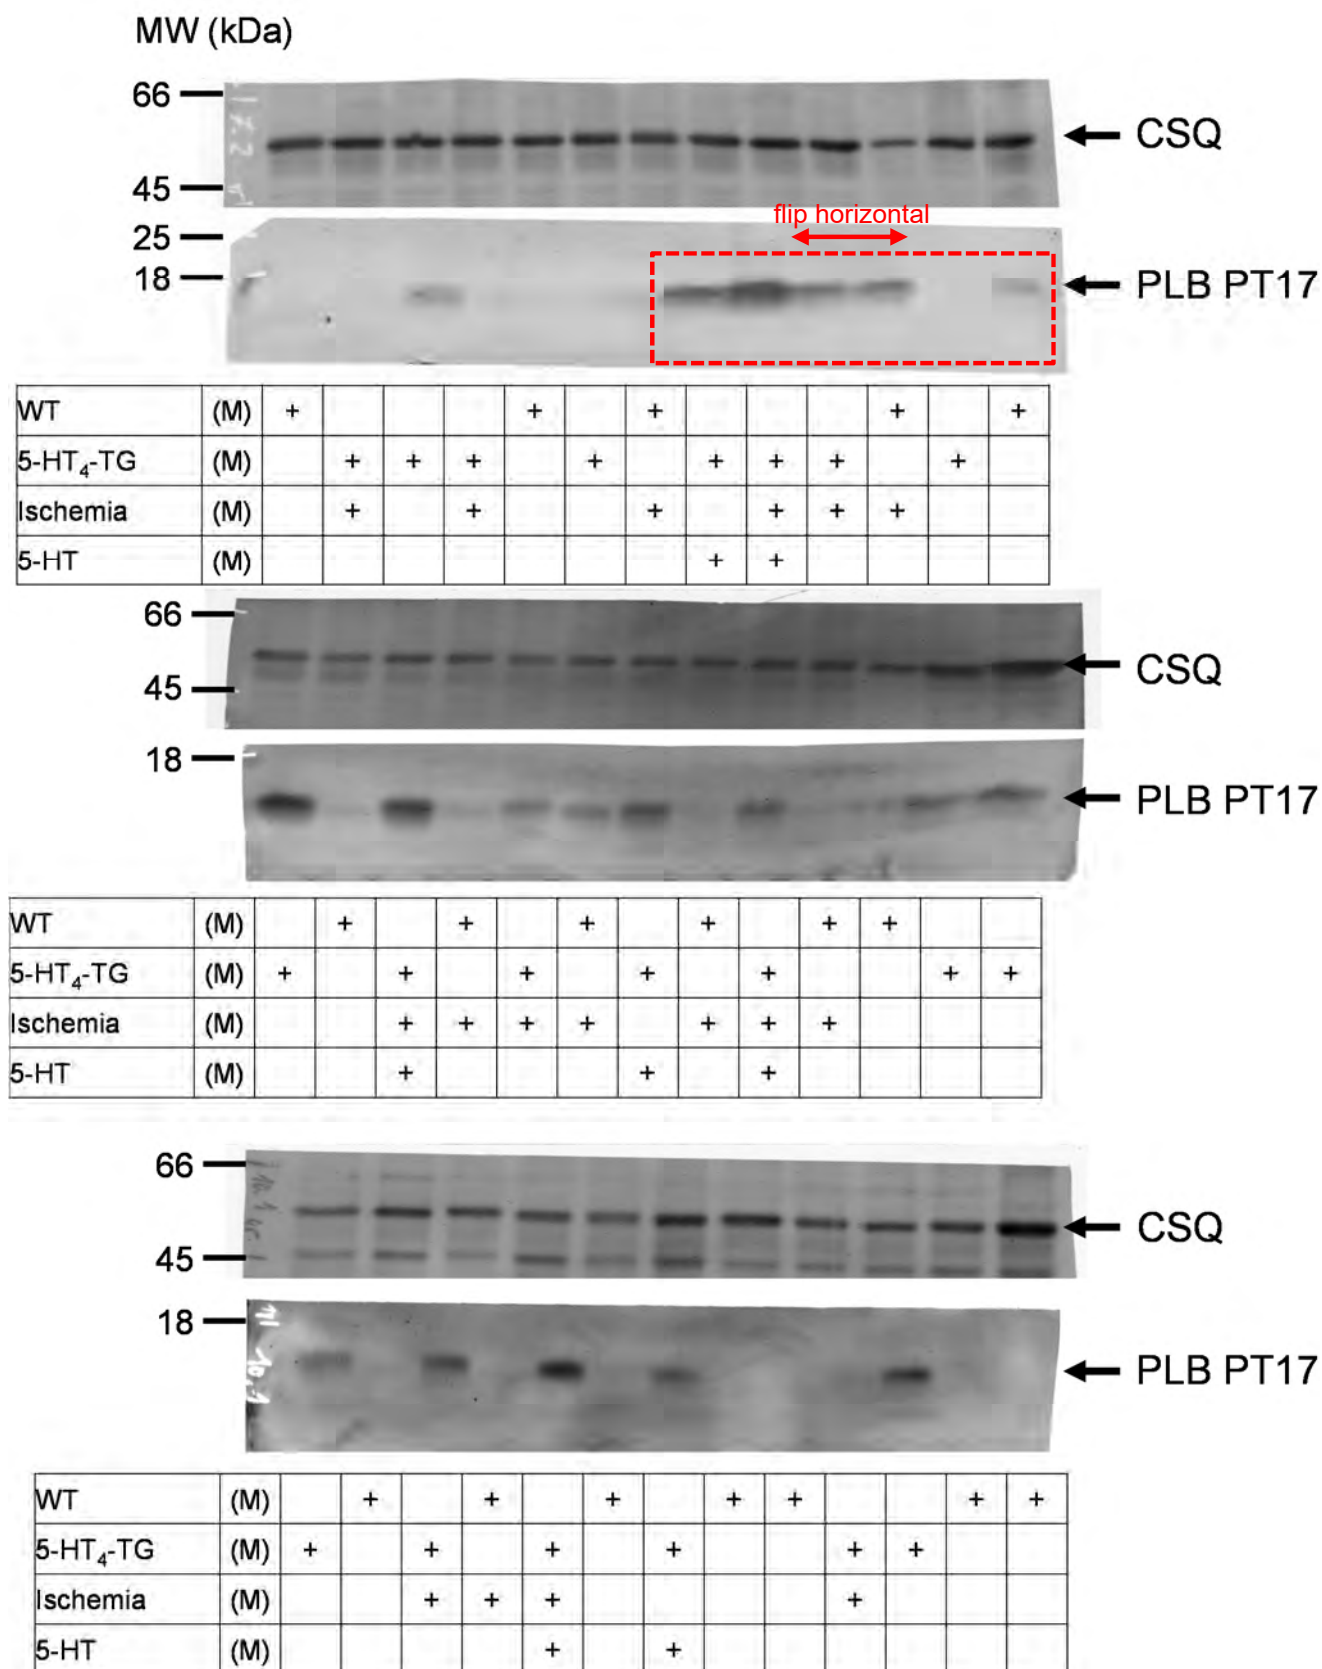

**Supplementary Figure S6 (unedited Western blots):** Original Western blots of homogenates from isolated perfused hearts with or without ischemia of wild type (WT) and 5-HT<sub>4</sub> receptor transgenic (5-HT<sub>4</sub>-TG) mice. M, molecular weight marker; 5-HT, serotonin (1  $\mu$ M); CSQ, cardiac calsequestrin; PLB PT17, phospholamban phosphorylated at threonine 17. Not all bands were suitable for quantification (border lanes or duplicates). The red rectangle mark the part of the blot shown in Figure 7 after flipping horizontally.



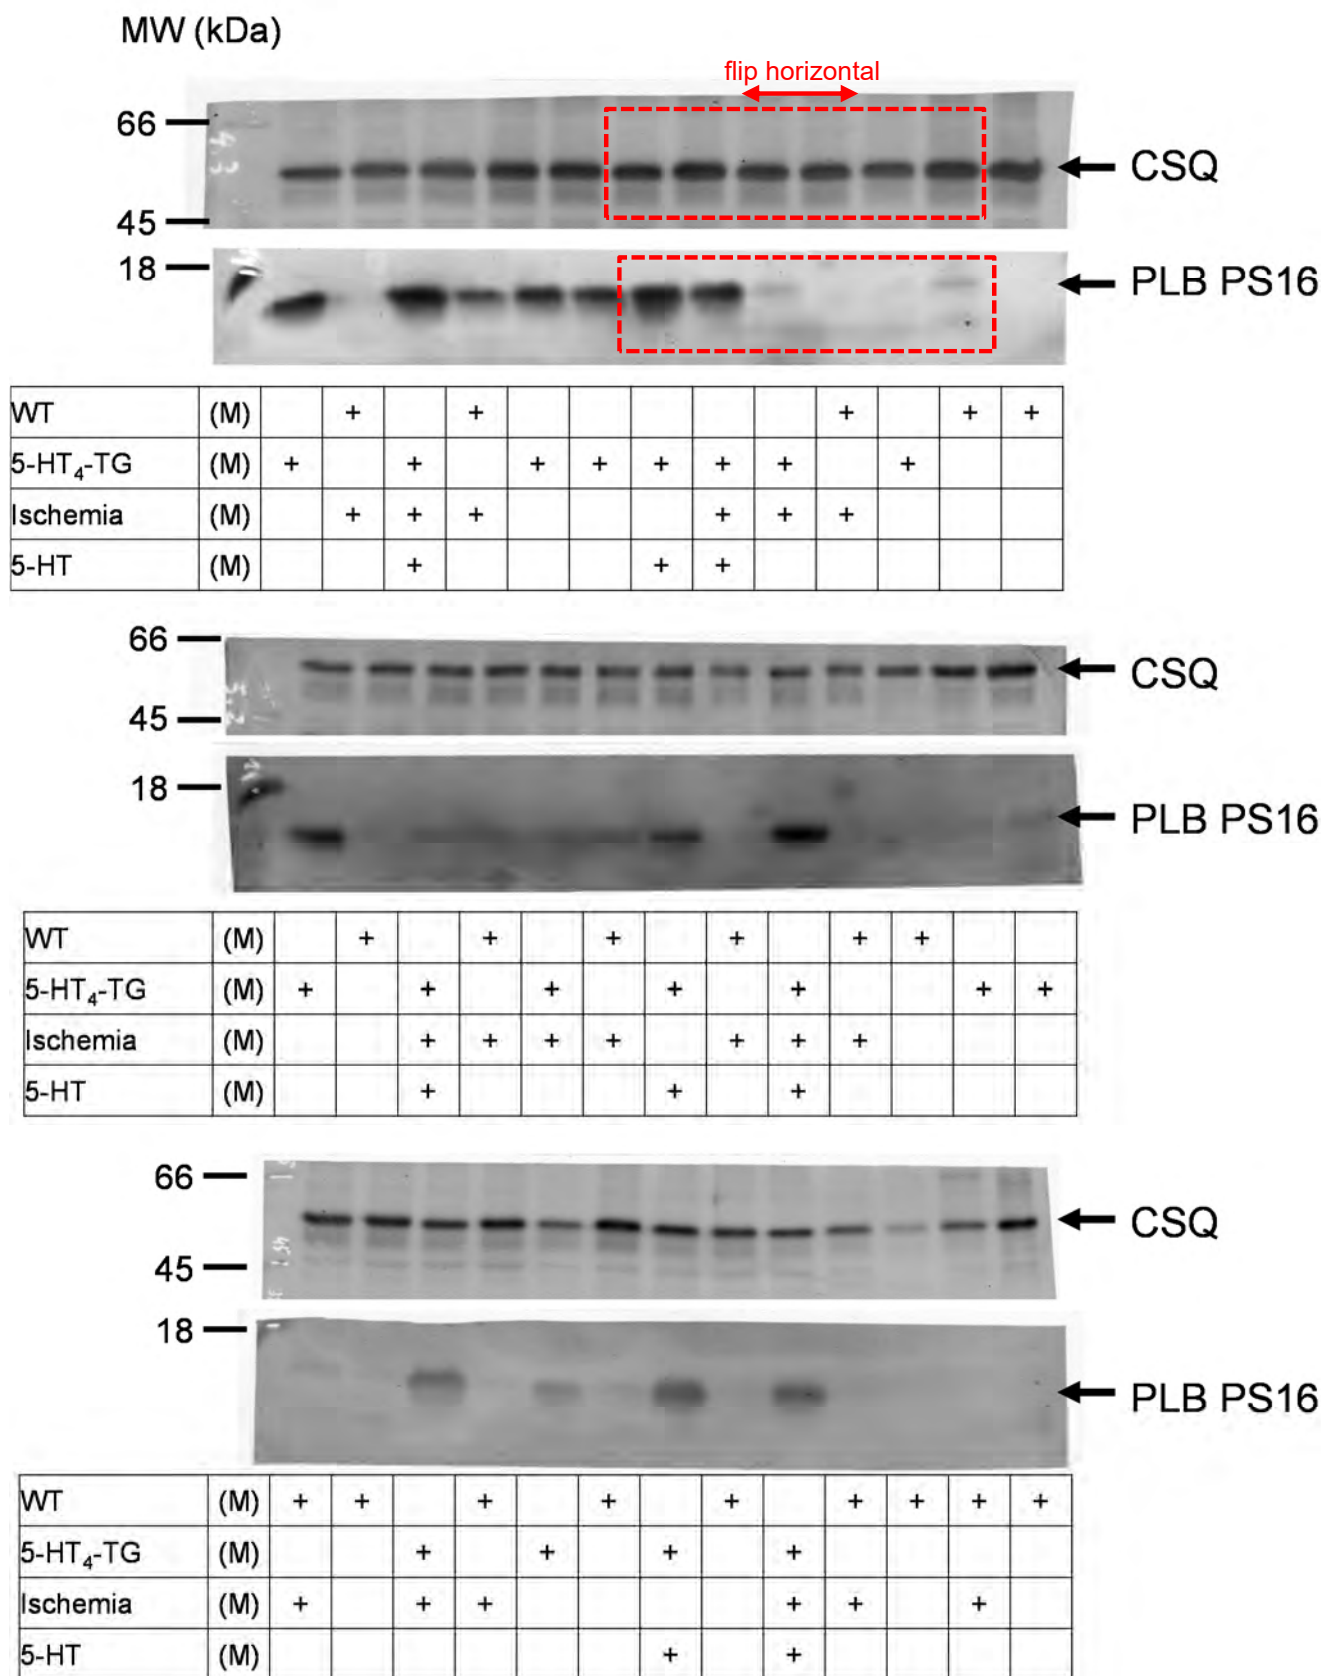

**Supplementary Figure S7 (unedited Western blots):** Original Western blots of homogenates from isolated perfused hearts with or without ischemia of wild type (WT) and 5-HT<sub>4</sub> receptor transgenic (5-HT<sub>4</sub>-TG) mice. M, molecular weight marker; 5-HT, serotonin (1  $\mu$ M); CSQ, cardiac calsequestrin; PLB PS16, phospholamban phosphorylated at serine 16. Not all bands were suitable for quantification (border lanes or duplicates). The red rectangles mark the part of the blot shown in Figure 7 after flipping horizontally.



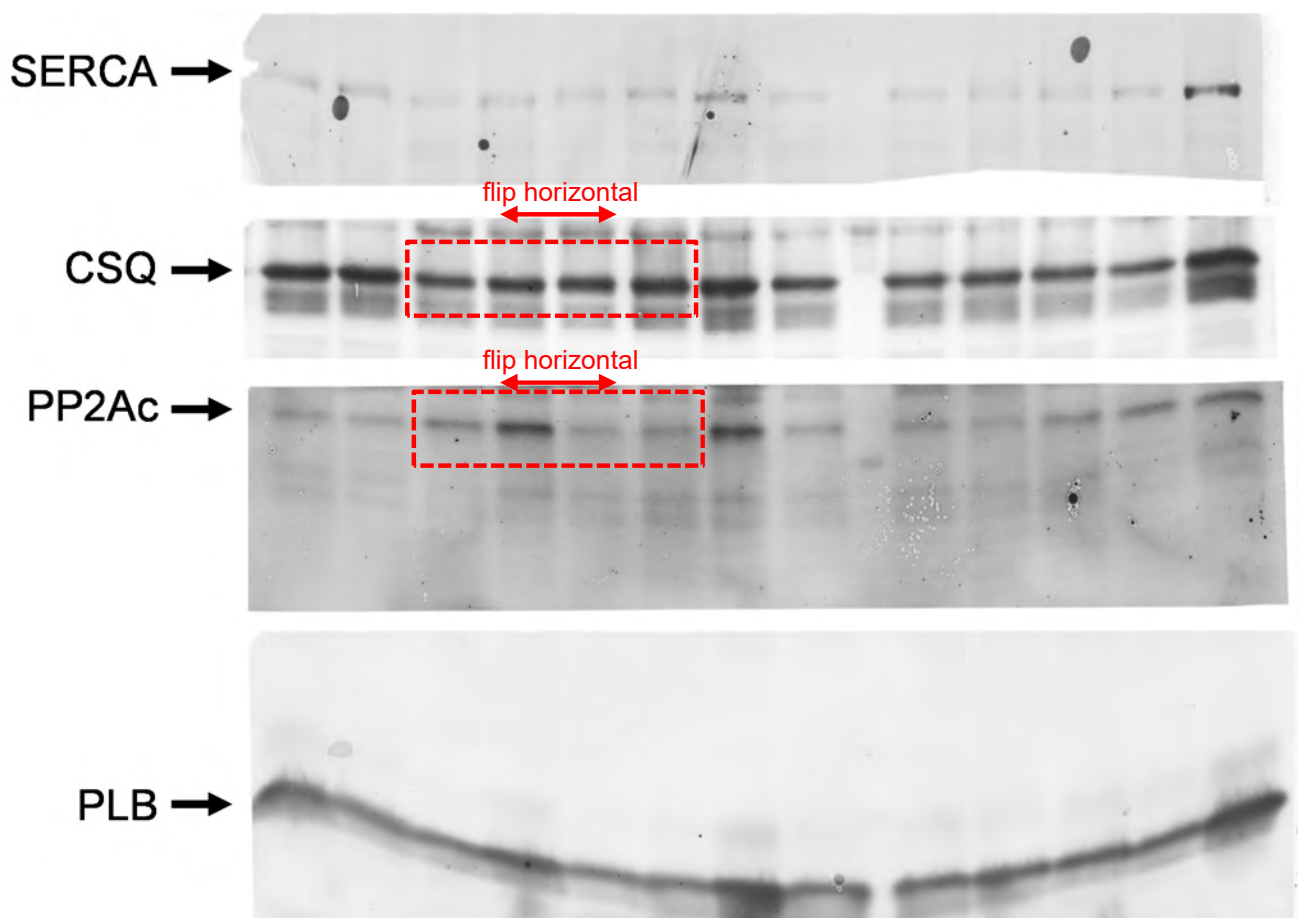

|                       |   |   |   |   |   |   |   |   |     |   |   |   |   |   |
|-----------------------|---|---|---|---|---|---|---|---|-----|---|---|---|---|---|
| WT                    | + |   |   |   |   | + |   |   | (M) |   | + |   |   |   |
| 5-HT <sub>4</sub> -TG |   | + |   |   | + |   |   |   | (M) | + |   |   |   |   |
| PP2A-TG               |   |   |   | + |   |   | + |   | (M) |   |   |   | + | + |
| DT                    |   |   | + |   |   |   |   | + | (M) |   |   | + |   |   |

**Supplementary Figure S8 (unedited Western blots):** Original Western blots (Gel 1) of cardiac homogenates from wild type (WT), 5-HT<sub>4</sub> receptor transgenic (5-HT<sub>4</sub>-TG), PP2A transgenic (PP2A-TG), and double transgenic (DT) mice. M, molecular weight marker; CSQ, calsequestrin; SERCA, sarcoplasmic reticulum Ca<sup>2+</sup> ATPase; PLB, phospholamban; PP2Ac, catalytic subunit of protein phosphatase 2A. The red rectangles mark the parts of the blot shown in the Figure 9 after flipping horizontally.

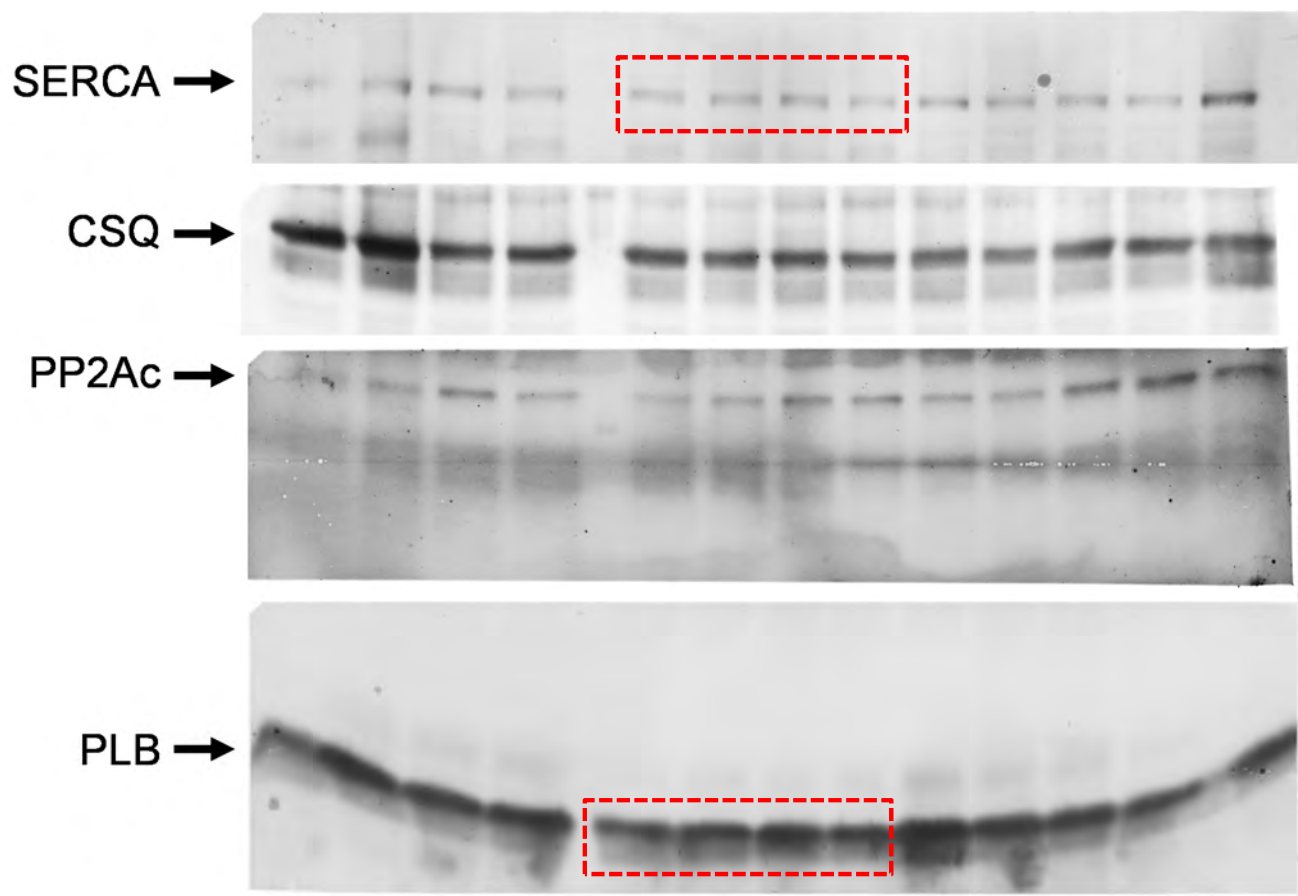

|                       |   |   |   |   |     |   |   |   |   |  |   |   |   |   |   |
|-----------------------|---|---|---|---|-----|---|---|---|---|--|---|---|---|---|---|
| WT                    | + |   |   |   | (M) | + |   |   |   |  | + |   |   |   |   |
| 5-HT <sub>4</sub> -TG |   | + |   |   | (M) |   | + |   |   |  |   | + |   |   |   |
| PP2A-TG               |   |   | + |   | (M) |   |   | + |   |  |   |   | + |   |   |
| DT                    |   |   |   | + | (M) |   |   |   | + |  |   |   |   | + | + |

**Supplementary Figure S9 (unedited Western blots):** Original Western blots (Gel 2) of cardiac homogenates from wild type (WT), 5-HT<sub>4</sub> receptor transgenic (5-HT<sub>4</sub>-TG), PP2A transgenic (PP2A-TG), and double transgenic (DT) mice. M, molecular weight marker; CSQ, calsequestrin; SERCA, sarcoplasmic reticulum Ca<sup>2+</sup> ATPase; PLB, phospholamban; PP2Ac, catalytic subunit of protein phosphatase 2A. The red rectangles mark the parts of the blot shown in the Figure 9.
