# Supplementary material for: Influence of Serotonin 5-HT4 Receptors on Responses to Cardiac Stressors in Transgenic Mouse Models
Source: MDPI journal article supplement (doi:10.3390/biomedicines9050569), 2021-05-18
Supplement: s1 [file s1]

**Supplementary Table 1.** Echocardiography of wild type (WT) and 5-HT<sub>4</sub>-transgenic (5-HT<sub>4</sub>-TG) mice before (basal) and seven hours after lipopolysaccharide (LPS) treatment (30 µg/g body weight ). NaCl injection served as control. Data shown are means ± SEM of n mice.

| Parameters                       | WT          |             |             |              | 5-HT <sub>4</sub> -TG |             |             |              |
|----------------------------------|-------------|-------------|-------------|--------------|-----------------------|-------------|-------------|--------------|
|                                  | NaCl        |             | LPS         |              | NaCl                  |             | LPS         |              |
|                                  | basal       | 7 h         | basal       | 7 h          | basal                 | 7 h         | basal       | 7 h          |
| <b>n</b>                         | 10          | 10          | 10          | 10           | 11                    | 11          | 12          | 12           |
| <b>EF (%)</b>                    | 70.1 ± 0.8  | 68.4 ± 0.9  | 70.8 ± 0.9  | 58.8 ± 6.5*  | 73.0 ± 0.8            | 72.5 ± 0.8  | 72.9 ± 1.7  | 61.4 ± 4.6*  |
| <b>HR (bpm)</b>                  | 461 ± 9.5   | 442 ± 11.8  | 487 ± 6.4   | 588 ± 16.7*  | 489 ± 12.1            | 480 ± 9.8   | 460 ± 10.5  | 581 ± 22.7*  |
| <b>Pulsed wave Doppler</b>       |             |             |             |              |                       |             |             |              |
| <b>Mitral valve</b>              |             |             |             |              |                       |             |             |              |
| <b>E velocity (mm/s)</b>         | 836 ± 31.0  | 848 ± 24.9  | 793 ± 28.9  | 466 ± 41.5*  | 833 ± 20.9            | 835 ± 23.1  | 902 ± 53.8  | 592 ± 30.7*  |
| <b>A velocity (mm/s)</b>         | 506 ± 23.1  | 511 ± 21.8  | 491 ± 21.3  | 283 ± 27.9*  | 480 ± 9.3             | 493 ± 14.4  | 591 ± 40.3  | 379 ± 20.4*  |
| <b>E/A</b>                       | 1.67 ± 0.06 | 1.68 ± 0.07 | 1.63 ± 0.05 | 1.73 ± 0.05  | 1.74 ± 0.04           | 1.66 ± 0.03 | 1.54 ± 0.05 | 1.57 ± 0.04  |
| <b>Tricuspid valve</b>           |             |             |             |              |                       |             |             |              |
| <b>E velocity (mm/s)</b>         | 307 ± 25.8  | 288 ± 28.2  | 381 ± 26.9  | 267 ± 19.1   | 321 ± 13.3            | 348 ± 17.3  | 392 ± 26.3  | 222 ± 24.2*  |
| <b>A velocity (mm/s)</b>         | 499 ± 35.6  | 468 ± 36.5  | 628 ± 30.4  | 450 ± 20.2   | 558 ± 18.7            | 544 ± 21.3  | 601 ± 38.1  | 426 ± 44.2*  |
| <b>E/A</b>                       | 0.61 ± 0.01 | 0.61 ± 0.02 | 0.61 ± 0.03 | 0.62 ± 0.04  | 0.57 ± 0.02           | 0.63 ± 0.02 | 0.65 ± 0.02 | 0.54 ± 0.02* |
| <b>Peak velocity</b>             |             |             |             |              |                       |             |             |              |
| <b>Ascending aorta (mm/s)</b>    | 1054 ± 52.7 | 1079 ± 44.4 | 1158 ± 67.1 | 783 ± 48.8*  | 1128 ± 57.5           | 1143 ± 56.1 | 1208 ± 67.9 | 799 ± 49.1*  |
| <b>Descending aorta (mm/s)</b>   | -975 ± 49.1 | -996 ± 43.6 | -970 ± 36.1 | -589 ± 31.8* | -995 ± 31.8           | -989 ± 30.7 | -966 ± 76.4 | -662 ± 46.8* |
| <b>Pulmonary artery (mm/s)</b>   | -656 ± 45.3 | -612 ± 60.6 | -671 ± 27.2 | -453 ± 32.5* | -754 ± 18.0           | -762 ± 15.6 | -782 ± 40.9 | -453 ± 32.5* |
| <b>Pulmonary vein</b>            |             |             |             |              |                       |             |             |              |
| <b>Diastolic velocity (mm/s)</b> | 593 ± 35.6  | 591 ± 36.0  | 662 ± 25.6  | 413 ± 39.4*  | 631 ± 27.0            | 633 ± 20.0  | 683 ± 37.9  | 491 ± 31.1*  |
| <b>Systolic velocity (mm/s)</b>  | 230 ± 13.8  | 224 ± 16.0  | 224 ± 20.3  | 129 ± 15.4*  | 215 ± 11.5            | 210 ± 6.6   | 250 ± 24.0  | 144 ± 12.4*  |
| <b>Superior vena cava</b>        |             |             |             |              |                       |             |             |              |
| <b>Diastolic velocity (mm/s)</b> | -298 ± 21.9 | -304 ± 24.0 | -338 ± 19.7 | -184 ± 17.0* | -275 ± 24.5           | -286 ± 22.4 | -333 ± 32.2 | -201 ± 20.2* |
| <b>Systolic velocity (mm/s)</b>  | -202 ± 20.6 | -207 ± 15.5 | -252 ± 11.3 | -140 ± 16.5* | -209 ± 26.7           | -209 ± 27.4 | -229 ± 29.2 | -122 ± 11.2* |
| <b>Tissue Doppler</b>            |             |             |             |              |                       |             |             |              |
| <b>E' velocity (mm/s)</b>        | -32.8 ± 2.5 | -29.0 ± 2.1 | -30.3 ± 1.9 | -19.5 ± 1.1* | -31.6 ± 1.7           | -30.6 ± 1.4 | -32.7 ± 3.0 | -22.4 ± 1.7* |
| <b>A' velocity (mm/s)</b>        | -22.3 ± 2.0 | -19.4 ± 1.5 | -21.4 ± 1.7 | -13.2 ± 0.9* | -20.0 ± 1.3           | -20.3 ± 1.1 | -21.0 ± 1.6 | -14.0 ± 1.0* |
| <b>E'/A'</b>                     | 1.49 ± 0.03 | 1.48 ± 0.03 | 1.45 ± 0.07 | 1.47 ± 0.04  | 1.60 ± 0.03           | 1.55 ± 0.04 | 1.56 ± 0.05 | 1.72 ± 0.12  |

EF, ejection fraction; HR, heart rate; \*p < 0.05 vs. basal

**Supplementary Table 2.** Characteristics of experimental mice. Body weight and heart weight (absolute and relative) of wild type (WT), 5-HT<sub>4</sub>-TG, PP2A-TG and double transgenic (DT) mice are given. The relative weights were calculated as organ weight/body weight. TG, transgenic mice. Data shown are means  $\pm$  SEM.

| Parameters                       | WT                 | 5-HT <sub>4</sub> -TG | PP2A-TG                         | DT                 |
|----------------------------------|--------------------|-----------------------|---------------------------------|--------------------|
| <b>n</b>                         | 6                  | 7                     | 7                               | 8                  |
| <b>Body weight (g)</b>           | 40.7 $\pm$ 3.3     | 40.8 $\pm$ 2.8        | 42.8 $\pm$ 2.0                  | 41.3 $\pm$ 1.6     |
| <b>Heart weight (mg)</b>         | 177.38 $\pm$ 16.74 | 207.83 $\pm$ 19.10    | 259.71 $\pm$ 17.19 <sup>#</sup> | 229.01 $\pm$ 18.53 |
| <b>LA weight (mg)</b>            | 3.78 $\pm$ 0.42    | 6.61 $\pm$ 1.10       | 8.09 $\pm$ 1.27 <sup>#</sup>    | 5.89 $\pm$ 0.40    |
| <b>RA weight (mg)</b>            | 4.93 $\pm$ 0.53    | 6.73 $\pm$ 1.15       | 8.63 $\pm$ 1.69                 | 7.08 $\pm$ 0.68    |
| <b>Ventricle weight (mg)</b>     | 163.33 $\pm$ 15.16 | 188.61 $\pm$ 18.30    | 234.03 $\pm$ 15.51 <sup>#</sup> | 206.66 $\pm$ 16.18 |
| <b>Relative heart weight</b>     | 4.36 $\pm$ 0.21    | 5.06 $\pm$ 0.20       | 6.13 $\pm$ 0.51 <sup>#</sup>    | 5.51 $\pm$ 0.32    |
| <b>Relative LA weight</b>        | 0.10 $\pm$ 0.01    | 0.16 $\pm$ 0.02       | 0.19 $\pm$ 0.02 <sup>#</sup>    | 0.14 $\pm$ 0.01    |
| <b>Relative RA weight</b>        | 0.12 $\pm$ 0.01    | 0.16 $\pm$ 0.02       | 0.20 $\pm$ 0.03                 | 0.17 $\pm$ 0.01    |
| <b>Relative ventricle weight</b> | 4.02 $\pm$ 0.16    | 4.58 $\pm$ 0.20       | 5.54 $\pm$ 0.49 <sup>#</sup>    | 4.98 $\pm$ 0.27    |

LA, left atrium; RA, right atrium; <sup>#</sup>p < 0.05 vs. WT

**Supplementary Table 3.** Echocardiography of wild type (WT), 5-HT<sub>4</sub>-transgenic (5-HT<sub>4</sub>-TG), PP2A-transgenic (PP2A-TG) and double transgenic (DT) mice. Data shown are means ± SEM of n mice.

| Parameters                    | WT          |            |             | 5-HT <sub>4</sub> -TG   |                          |             | PP2A-TG                   |                          |                           | DT                       |                            |                           |
|-------------------------------|-------------|------------|-------------|-------------------------|--------------------------|-------------|---------------------------|--------------------------|---------------------------|--------------------------|----------------------------|---------------------------|
|                               | basal       | 5-HT       | Iso         | basal                   | 5-HT                     | Iso         | basal                     | 5-HT                     | Iso                       | basal                    | 5-HT                       | Iso                       |
| <b>n</b>                      | 18          | 7          | 7           | 18                      | 8                        | 8           | 7                         | 7                        | 7                         | 10                       | 10                         | 10                        |
| <b>EF (%)</b>                 | 71.1 ± 1.2  | 78.2 ± 3.5 | 98.7 ± 0.8* | 65.9 ± 1.5              | 97.0 ± 2.2* <sup>#</sup> | 97.8 ± 1.1* | 39.9 ± 3.4 <sup>§#</sup>  | 45.5 ± 3.6 <sup>§#</sup> | 78.4 ± 3.1* <sup>§#</sup> | 39.8 ± 2.1 <sup>§#</sup> | 59.9 ± 5.2* <sup>§#+</sup> | 68.1 ± 5.5* <sup>§#</sup> |
| <b>HR (bpm)</b>               | 494 ± 17    | 509 ± 47   | 605 ± 31*   | 455 ± 7                 | 538 ± 17*                | 546 ± 17*   | 467 ± 11                  | 466 ± 14                 | 528 ± 20 <sup>#</sup>     | 473 ± 13                 | 521 ± 17*                  | 537 ± 19                  |
| <b>Pulsed wave Doppler</b>    |             |            |             |                         |                          |             |                           |                          |                           |                          |                            |                           |
| <b>Mitral valve</b>           |             |            |             |                         |                          |             |                           |                          |                           |                          |                            |                           |
| <b>E velocity (mm/s)</b>      | 808 ± 24.7  | n.d.       | n.d.        | 846 ± 31.5              | n.d.                     | n.d.        | 757 ± 55.6                | n.d.                     | n.d.                      | 665 ± 27.2 <sup>§#</sup> | n.d.                       | n.d.                      |
| <b>A velocity (mm/s)</b>      | 483 ± 11.4  | n.d.       | n.d.        | 491 ± 25.8              | n.d.                     | n.d.        | 333 ± 62.8 <sup>§#</sup>  | n.d.                     | n.d.                      | 313 ± 41.2 <sup>§#</sup> | n.d.                       | n.d.                      |
| <b>E/A</b>                    | 1.68 ± 0.05 | n.d.       | n.d.        | 1.76 ± 0.06             | n.d.                     | n.d.        | 1.96 ± 0.08 <sup>#</sup>  | n.d.                     | n.d.                      | 1.90 ± 0.09 <sup>#</sup> | n.d.                       | n.d.                      |
| <b>Tricuspid valve</b>        |             |            |             |                         |                          |             |                           |                          |                           |                          |                            |                           |
| <b>E velocity (mm/s)</b>      | 304 ± 16.8  | n.d.       | n.d.        | 261 ± 22.2              | n.d.                     | n.d.        | 197 ± 23.5 <sup>#</sup>   | n.d.                     | n.d.                      | 233 ± 25.9 <sup>#</sup>  | n.d.                       | n.d.                      |
| <b>A velocity (mm/s)</b>      | 530 ± 25.1  | n.d.       | n.d.        | 435 ± 33.0 <sup>#</sup> | n.d.                     | n.d.        | 334 ± 38.1 <sup>#</sup>   | n.d.                     | n.d.                      | 369 ± 39.5 <sup>#</sup>  | n.d.                       | n.d.                      |
| <b>E/A</b>                    | 0.57 ± 0.02 | n.d.       | n.d.        | 0.60 ± 0.02             | n.d.                     | n.d.        | 0.57 ± 0.03               | n.d.                     | n.d.                      | 0.63 ± 0.04              | n.d.                       | n.d.                      |
| <b>Peak velocity</b>          |             |            |             |                         |                          |             |                           |                          |                           |                          |                            |                           |
| <b>Ascending aorta (mm/s)</b> | 1032 ± 60   | 909 ± 112  | 1264 ± 115  | 1098 ± 44               | 1382 ± 139 <sup>#</sup>  | 1459 ± 129* | 837 ± 74 <sup>§</sup>     | 824 ± 73 <sup>§</sup>    | 1106 ± 132 <sup>§</sup>   | 862 ± 55 <sup>§</sup>    | 1118 ± 72 <sup>+</sup>     | 1248 ± 99*                |
| <b>Tissue Doppler</b>         |             |            |             |                         |                          |             |                           |                          |                           |                          |                            |                           |
| <b>E' velocity (mm/s)</b>     | -27.7 ± 1.9 | n.d.       | n.d.        | -30.2 ± 2.7             | n.d.                     | n.d.        | -32.8 ± 4.8               | n.d.                     | n.d.                      | -30.9 ± 4.6              | n.d.                       | n.d.                      |
| <b>A' velocity (mm/s)</b>     | -19.1 ± 0.9 | n.d.       | n.d.        | -20.6 ± 1.8             | n.d.                     | n.d.        | -16.7 ± 4.1               | n.d.                     | n.d.                      | -18.2 ± 2.9              | n.d.                       | n.d.                      |
| <b>E'/A'</b>                  | 1.43 ± 0.07 | n.d.       | n.d.        | 1.48 ± 0.07             | n.d.                     | n.d.        | 1.93 ± 0.19 <sup>§#</sup> | n.d.                     | n.d.                      | 1.70 ± 0.16              | n.d.                       | n.d.                      |

EF, ejection fraction; HR, heart rate; n.d., not determined; \*p < 0.05 vs. basal; <sup>#</sup>p < 0.05 vs. WT; <sup>§</sup>p < 0.05 vs. 5-HT<sub>4</sub>-TG; <sup>+</sup>p < 0.05 vs. PP2A-TG
